# Supplementary material for: Spring blooms in the Baltic Sea have weakened but lengthened from 2000 to 2014
Source: Copernicus journal article supplement (doi:10.5194/bg-13-4959-2016), 2016-09-08
Supplement: Supplementary file 1 [file appendix_metric_results_v2.xls]

## Sheet: Sheet1
BOM
YEAR	METRIC	BLOOMIDX	CONCAVG	PEAKHEIGHT	DURATION	STARTDAY	PEAKDAY	ENDDAY	NUT_PEAKDAY	NUT_PEAKVALUE	NUT_DEPLDAY_25	NUT_DEPLDAY_50	NUT_MINDAY	NUT_MINVALUE	NUT_SLOPE
2000	const5			15.66			84	98
2000	median5			15.66			84	99
2000	weibull	136.63	11.39	15.66	11	84	84	95
2001	const5			16.7			72	93	41	3.7	90	72	118	0.26	-0.06
2001	median5			16.7			72	96	41	3.7	90	72	118	0.26	-0.06
2001	weibull	389.12	13.42	16.7	28	59	72	87	41	3.7	90	72	118	0.26	-0.06
2002	const5	239.17	7.72	9.62	30	71	88	101	41	4.2	94	83	132	0.4	-0.11
2002	median5	388.24	5.97	9.62	64	70	88	134	41	4.2	94	83	132	0.4	-0.11
2002	weibull	228.01	7.86	9.62	28	70	88	98	41	4.2	94	83	132	0.4	-0.11
2003	const5			16.66			56	77	41	3.76	64	54	144	0.25	-0.12
2003	median5			16.66			56	79	41	3.76	64	54	144	0.25	-0.12
2003	weibull	606.4	15.16	16.66	39		56	70	41	3.76	64	54	144	0.25	-0.12
2004	const5	139.34	5.81	6.38	23	63	75	86	44	3.79	82	71	126	0.29	-0.09
2004	median5	178.01	5.39	6.38	32	58	75	90	44	3.79	82	71	126	0.29	-0.09
2004	weibull	192.38	5.2	6.38	36	54	75	90	44	3.79	82	71	126	0.29	-0.09
2005	const5	205.82	6.24	7.34	32	72	85	104	64	3.47	97	87	129	0.43	-0.11
2005	median5	266.84	5.68	7.34	46	67	85	113	64	3.47	97	87	129	0.43	-0.11
2005	weibull	236.6	5.91	7.34	39	73	85	112	64	3.47	97	87	129	0.43	-0.11
2006	const5			17.39			54	81	42	3.54	86	62	104	0.63	-0.05
2006	median5			17.39			54	121	42	3.54	86	62	104	0.63	-0.05
2006	weibull	496.7	15.52	17.39	31	41	54	72	42	3.54	86	62	104	0.63	-0.05
2007	const5	577.04	11.54	18.9	49	60	87	109	56	3.35	105	76	116	0.28	-0.02
2007	median5			18.9			87	111	56	3.35	105	76	116	0.28	-0.02
2007	weibull	479.23	14.1	18.9	33	70	87	103	56	3.35	105	76	116	0.28	-0.02
2008	const5	216.05	6.17	7.2	34	58	76	92	41	4.5	86	74	102	0.53	-0.1
2008	median5	463.86	5.27	7.2	87	54	76	141	41	4.5	86	74	102	0.53	-0.1
2008	weibull	223.55	5.88	7.2	37	51	76	88	41	4.5	86	74	102	0.53	-0.1
2009	const5			7.39			54	68	41	2.39	69	61	146	0.07	-0.08
2009	median5			7.39			54	71	41	2.39	69	61	146	0.07	-0.08
2009	weibull	144.39	6.28	7.39	22		54		41	2.39	69	61	146	0.07	-0.08
2010	const5			13.53			65	90	41	3.6	68	61		0	-0.14
2010	median5			13.53			65	99	41	3.6	68	61		0	-0.14
2010	weibull	479.87	10.43	13.53	45		65	76	41	3.6	68	61		0	-0.14
2011	const5	489.08	9.23	13.47	52	60	81	112	41	3.18	72	62	98	0.12	-0.08
2011	median5	523.36	8.58	13.47	60	58	81	118	41	3.18	72	62	98	0.12	-0.08
2011	weibull	456.85	9.72	13.47	46	60	81	106	41	3.18	72	62	98	0.12	-0.08
2012	const5	97.62	5.42	5.78	17	74	82	91	58	3.68	91	83	118	0	-0.12
2012	median5	176.39	4.9	5.78	35	70	82	105	58	3.68	91	83	118	0	-0.12
2012	weibull	208	4.62	5.78	44	67	82	111	58	3.68	91	83	118	0	-0.12
2013	const5	300.05	6.52	7.33	45	85	104	130	44	4.85	95	88	121	0	-0.17
2013	median5	343.51	6.13	7.33	55	81	104	136	44	4.85	95	88	121	0	-0.17
2013	weibull	342.75	6.12	7.33	55	79	104	134	44	4.85	95	88	121	0	-0.17
2014	const5			20.71			59	91			144		150	0.03	-0.02
2014	median5			20.71			59	98			144		150	0.03	-0.02
2014	weibull	719.04	17.12	20.71	41		59	72			144		150	0.03	-0.02
GOF
YEAR	METRIC	BLOOMIDX	CONCAVG	PEAKHEIGHT	DURATION	STARTDAY	PEAKDAY	ENDDAY	NUT_PEAKDAY	NUT_PEAKVALUE	NUT_DEPLDAY_25	NUT_DEPLDAY_50	NUT_MINDAY	NUT_MINVALUE	NUT_SLOPE
2000	const5	823.55	15.84	29.55	51	88	116	139	95	4.16	117	110	126	0.22	-0.18
2000	median5	828.28	15.63	29.55	52	88	116	140	95	4.16	117	110	126	0.22	-0.18
2000	weibull	688.78		29.55	31	99	116	130	95	4.16	117	110	126	0.22	-0.18
2001	const5					69	106		66	4.08	101	93	136	0.12	-0.15
2001	median5					69	106		66	4.08	101	93	136	0.12	-0.15
2001	weibull	986.68			30	89	106	119	66	4.08	101	93	136	0.12	-0.15
2002	const5	637.77	11.6	18.48	54	86	113	140	71	5.54	113	105	150	0.31	-0.19
2002	median5	642.44	11.47	18.48	55	86	113	141	71	5.54	113	105	150	0.31	-0.19
2002	weibull	566.08	13.16	18.48	42	88	113	130	71	5.54	113	105	150	0.31	-0.19
2003	const5			27.68			114		70	4.34	113	107	147	0.23	-0.17
2003	median5			27.68			114		70	4.34	113	107	147	0.23	-0.17
2003	weibull	939.27		27.68	44	94	114	138	70	4.34	113	107	147	0.23	-0.17
2004	const5		13.99	27.57	86	62	110	148	50	5.56	103	95	146	0.35	-0.17
2004	median5		13.99	27.57	86	62	110	148	50	5.56	103	95	146	0.35	-0.17
2004	weibull	928.62	20.19	27.57	45	83	110	128	50	5.56	103	95	146	0.35	-0.17
2005	const5	1005.94	13.78	24.73	72	76	116	148	69	5.13	122	111	150	0.23	-0.11
2005	median5	1005.94	13.78	24.73	72	76	116	148	69	5.13	122	111	150	0.23	-0.11
2005	weibull	823.63	17.91	24.73	45	92	116	137	69	5.13	122	111	150	0.23	-0.11
2006	const5	589.65	10.17	16.73	57	89	114	146	62	4.44	117	107	142	0.13	-0.11
2006	median5	589.65	10.17	16.73	57	89	114	146	62	4.44	117	107	142	0.13	-0.11
2006	weibull	481.49	12.04	16.73	39	91	114	130	62	4.44	117	107	142	0.13	-0.11
2007	const5	609.12	11.49	17.86	52	83	110	135	63	5.28	108	99	145	0.45	-0.15
2007	median5	609.12	11.49	17.86	52	83	110	135	63	5.28	108	99	145	0.45	-0.15
2007	weibull	530.78	13.27	17.86	39	87	110	126	63	5.28	108	99	145	0.45	-0.15
2008	const5	735.03	13.61	23.21	53	88	120	141	47	5.34	118	110	143	0.2	-0.17
2008	median5	735.03	13.61	23.21	53	88	120	141	47	5.34	118	110	143	0.2	-0.17
2008	weibull	679.8	15.11	23.21	44	92	120	136	47	5.34	118	110	143	0.2	-0.17
2009	const5	531.11	10.41	15.36	50	83	110	133	61	5.08	108	100	150	0.01	-0.16
2009	median5	531.11	10.41	15.36	50	83	110	133	61	5.08	108	100	150	0.01	-0.16
2009	weibull	501.68	10.91	15.36	45	82	110	127	61	5.08	108	100	150	0.01	-0.16
2010	const5	690.63	10.63	16.52	64	86	112	150	63	5.23	118	106	135	0.27	-0.1
2010	median5			16.52		86	112		63	5.23	118	106	135	0.27	-0.1
2010	weibull	556.17	12.64	16.52	43	90	112	133	63	5.23	118	106	135	0.27	-0.1
2011	const5	892.1	11.15	21.02	79	70	117	149	41	5.81	117	104	137	0.43	-0.12
2011	median5	896.7	11.07	21.02	80	69	117	149	41	5.81	117	104	137	0.43	-0.12
2011	weibull	671.83	15.27	21.02	43	92	117	135	41	5.81	117	104	137	0.43	-0.12
2012	const5			19.98		88	115		63	5.82	116	106	135	0.22	-0.15
2012	median5			19.98		88	115		63	5.82	116	106	135	0.22	-0.15
2012	weibull	740.89	14.53	19.98	50	90	115	140	63	5.82	116	106	135	0.22	-0.15
2013	const5	576.72	9.3	12.43	61	83	107	144	50	4.81	114	103	149	0.03	-0.12
2013	median5	576.72	9.3	12.43	61	83	107	144	50	4.81	114	103	149	0.03	-0.12
2013	weibull	543.59	9.71	12.43	55	83	107	138	50	4.81	114	103	149	0.03	-0.12
2014	const5	515.5	8.31	11.03	61	81	102	142	63	5.48	116	104	150	0.15	-0.11
2014	median5	524.89	8.2	11.03	63	80	102	143	63	5.48	116	104	150	0.15	-0.11
2014	weibull	466.21	8.8	11.03	52	84	102	136	63	5.48	116	104	150	0.15	-0.11
GOT
YEAR	METRIC	BLOOMIDX	CONCAVG	PEAKHEIGHT	DURATION	STARTDAY	PEAKDAY	ENDDAY	NUT_PEAKDAY	NUT_PEAKVALUE	NUT_DEPLDAY_25	NUT_DEPLDAY_50	NUT_MINDAY	NUT_MINVALUE	NUT_SLOPE
2000	const5	218.13	7.79	10.3	27	101	114	128	95	2.87	121	113	150	0.45	-0.09
2000	median5	251.73	6.45	10.3	38	97	114	135	95	2.87	121	113	150	0.45	-0.09
2000	weibull	217.75	7.78	10.3	27	100	114	127	95	2.87	121	113	150	0.45	-0.09
2001	const5	188.07	6.97	8.48	26	82	91	108	65	2.86	98	89	127	0.32	-0.09
2001	median5	300.32	5.01	8.48	59	76	91	135	65	2.86	98	89	127	0.32	-0.09
2001	weibull	215.41	6.34	8.48	33	79	91	112	65	2.86	98	89	127	0.32	-0.09
2002	const5	123.7	5.89	6.67	20	96	105	116	70	3.55	114	101	150	0.59	-0.08
2002	median5	201.18	4.68	6.67	42	86	105	128	70	3.55	114	101	150	0.59	-0.08
2002	weibull	192.13	4.8	6.67	39	84	105	123	70	3.55	114	101	150	0.59	-0.08
2003	const5	141.17	5.65	6.09	24	89	97	113	60	2.86	111	100	150	0.34	-0.06
2003	median5			6.09			97	139	60	2.86	111	100	150	0.34	-0.06
2003	weibull	251.94	4.75	6.09	52	79	97	131	60	2.86	111	100	150	0.34	-0.06
2004	const5	3.99	3.99	3.99	0	106	106	106	59	3.21	110	101	118	0.57	-0.1
2004	median5	126.15	3.15	3.99	39	89	106	128	59	3.21	110	101	118	0.57	-0.1
2004	weibull	211.41	2.86	3.99	73	77	106	150	59	3.21	110	101	118	0.57	-0.1
2005	const5	56.1	5.1	5.22	10	93	97	103	64	3.12	123	93	150	0.47	-0.03
2005	median5	175.43	3.9	5.22	44	80	97	124	64	3.12	123	93	150	0.47	-0.03
2005	weibull	177.76	3.86	5.22	45	79	97	124	64	3.12	123	93	150	0.47	-0.03
2006	const5	4.03	4.03	4.03	0	103	103	103	55	2.89	111	100	148	0.06	-0.07
2006	median5	130.55	3.26	4.03	39	90	103	129	55	2.89	111	100	148	0.06	-0.07
2006	weibull	154.55	2.97	4.03	51	82	103	133	55	2.89	111	100	148	0.06	-0.07
2007	const5	167.13	6.69	7.51	24	90	104	114	66	3.17	106	95	150	0.41	-0.08
2007	median5	235.72	5.12	7.51	45	81	104	126	66	3.17	106	95	150	0.41	-0.08
2007	weibull	200.67	5.9	7.51	33	84	104	117	66	3.17	106	95	150	0.41	-0.08
2008	const5	439.55	8.29	11.31	52	83	109	135	49	2.71	109	99	124	0.29	-0.07
2008	median5			11.31		56	109		49	2.71	109	99	124	0.29	-0.07
2008	weibull	413.08	8.43	11.31	48	79	109	127	49	2.71	109	99	124	0.29	-0.07
2009	const5	235.4	7.59	9.42	30	100	114	130	52	2.96	106	100	145	0.1	-0.12
2009	median5			9.42		88	114		52	2.96	106	100	145	0.1	-0.12
2009	weibull	258.34	6.8	9.42	37	91	114	128	52	2.96	106	100	145	0.1	-0.12
2010	const5	202.1	6.74	7.95	29	86	99	115	55	2.98	96	88	109	0.31	-0.1
2010	median5			7.95		78	99		55	2.98	96	88	109	0.31	-0.1
2010	weibull	232.04	6.27	7.95	36	82	99	118	55	2.98	96	88	109	0.31	-0.1
2011	const5	90.21	5.31	5.63	16	108	116	124	42	2.77	125	114	138	0.33	-0.06
2011	median5	218.26	4.12	5.63	52	87	116	139	42	2.77	125	114	138	0.33	-0.06
2011	weibull	204.94	4.27	5.63	47	87	116	134	42	2.77	125	114	138	0.33	-0.06
2012	const5	173.68	6.43	7.36	26	97	110	123	63	3.22	114	104	134	0.32	-0.09
2012	median5			7.36		84	110		63	3.22	114	104	134	0.32	-0.09
2012	weibull	229.74	5.34	7.36	42	83	110	125	63	3.22	114	104	134	0.32	-0.09
2013	const5	306.01	7.46	9.46	40	94	114	134	77	2.8	109	103	146	0.01	-0.12
2013	median5	384.13	6	9.46	63	85	114	148	77	2.8	109	103	146	0.01	-0.12
2013	weibull	330.17	7.02	9.46	46	89	114	135	77	2.8	109	103	146	0.01	-0.12
2014	const5	86.49	5.09	5.22	16	98	107	114	67	3.09	121	107	150	0.1	-0.06
2014	median5	221.62	4.18	5.22	52	81	107	133	67	3.09	121	107	150	0.1	-0.06
2014	weibull	203.06	4.41	5.22	45	84	107	129	67	3.09	121	107	150	0.1	-0.06
NBP
YEAR	METRIC	BLOOMIDX	CONCAVG	PEAKHEIGHT	DURATION	STARTDAY	PEAKDAY	ENDDAY	NUT_PEAKDAY	NUT_PEAKVALUE	NUT_DEPLDAY_25	NUT_DEPLDAY_50	NUT_MINDAY	NUT_MINVALUE	NUT_SLOPE
2000	const5	412.65	11.46	16.88	35	98	115	133	95	3.48	118	111	150	0.35	-0.13
2000	median5	468.99	9.2	16.88	50	96	115	146	95	3.48	118	111	150	0.35	-0.13
2000	weibull	374.13	12.9	16.88	28	100	115	128	95	3.48	118	111	150	0.35	-0.13
2001	const5	499.74	12.19	18.49	40	81	100	121	66	2.84	101	93	143	0.13	-0.1
2001	median5			18.49		78	100		66	2.84	101	93	143	0.13	-0.1
2001	weibull	445.88	13.93	18.49	31	84	100	115	66	2.84	101	93	143	0.13	-0.1
2002	const5	325.17	8.13	11.03	39	88	105	127	75	3.63	111	102	150	0.4	-0.11
2002	median5	388.57	6.94	11.03	55	85	105	140	75	3.63	111	102	150	0.4	-0.11
2002	weibull	326.24	7.96	11.03	40	85	105	125	75	3.63	111	102	150	0.4	-0.11
2003	const5	427.8	8.23	11.75	51	77	103	128	63	3.46	111	101	150	0.39	-0.09
2003	median5			11.75			103	146	63	3.46	111	101	150	0.39	-0.09
2003	weibull	334.05	9.54	11.75	34	85	103	119	63	3.46	111	101	150	0.39	-0.09
2004	const5	246.14	7.24	9.17	33	90	105	123	56	3.69	108	98	146	0.31	-0.1
2004	median5			9.17		86	105		56	3.69	108	98	146	0.31	-0.1
2004	weibull	252.31	6.82	9.17	36	84	105	120	56	3.69	108	98	146	0.31	-0.1
2005	const5	363.4	7.73	9.92	46	86	108	132	66	4.02	119	102	150	0.23	-0.06
2005	median5	415.15	6.92	9.92	59	81	108	140	66	4.02	119	102	150	0.23	-0.06
2005	weibull	375.67	7.51	9.92	49	83	108	132	66	4.02	119	102	150	0.23	-0.06
2006	const5	251.99	7.41	9.52	33	93	108	126	60	3.44	109	99	136	0.05	-0.09
2006	median5	330.83	6.13	9.52	53	88	108	141	60	3.44	109	99	136	0.05	-0.09
2006	weibull	277.32	6.76	9.52	40	86	108	126	60	3.44	109	99	136	0.05	-0.09
2007	const5	275.19	7.24	8.89	37	91	109	128	64	3.3	109	97	150	0.33	-0.09
2007	median5	334.65	6.31	8.89	52	85	109	137	64	3.3	109	97	150	0.33	-0.09
2007	weibull	301.9	6.71	8.89	44	84	109	128	64	3.3	109	97	150	0.33	-0.09
2008	const5	443.98	8.88	12.77	49	91	110	140	76	3.11	115	106	144	0.3	-0.1
2008	median5			12.77		85	110		76	3.11	115	106	144	0.3	-0.1
2008	weibull	401.52	9.13	12.77	43	86	110	129	76	3.11	115	106	144	0.3	-0.1
2009	const5	350.94	8.36	11.23	41	91	111	132	45	3.69	104	98	150	0.08	-0.15
2009	median5			11.23		86	111		45	3.69	104	98	150	0.08	-0.15
2009	weibull	335	8.17	11.23	40	85	111	125	45	3.69	104	98	150	0.08	-0.15
2010	const5	317.94	7.23	9.5	43	86	105	129	64	3.52	100	91	117	0.06	-0.1
2010	median5			9.5		82	105		64	3.52	100	91	117	0.06	-0.1
2010	weibull	285.61	7.52	9.5	37	85	105	122	64	3.52	100	91	117	0.06	-0.1
2011	const5	345.29	8.22	10.57	41	94	114	135	44	3.36	124	113	138	0.36	-0.08
2011	median5	392.03	7.26	10.57	53	90	114	143	44	3.36	124	113	138	0.36	-0.08
2011	weibull	350.83	7.97	10.57	43	90	114	133	44	3.36	124	113	138	0.36	-0.08
2012	const5	375.13	8.72	11.98	42	91	112	133	66	3.97	114	105	134	0.27	-0.12
2012	median5			11.98		87	112		66	3.97	114	105	134	0.27	-0.12
2012	weibull	349.82	8.75	11.98	39	87	112	126	66	3.97	114	105	134	0.27	-0.12
2013	const5	447.7	8.61	11.3	51	87	107	138	71	3.24	109	101	146	0.01	-0.11
2013	median5	491.5	7.8	11.3	62	83	107	145	71	3.24	109	101	146	0.01	-0.11
2013	weibull	445.73	8.57	11.3	51	85	107	136	71	3.24	109	101	146	0.01	-0.11
2014	const5	202.54	6.33	7.25	31	97	114	128	74	3.65	123	112	150	0.12	-0.09
2014	median5	273.62	5.47	7.25	49	90	114	139	74	3.65	123	112	150	0.12	-0.09
2014	weibull	245.69	5.71	7.25	42	88	114	130	74	3.65	123	112	150	0.12	-0.09
SBP
YEAR	METRIC	BLOOMIDX	CONCAVG	PEAKHEIGHT	DURATION	STARTDAY	PEAKDAY	ENDDAY	NUT_PEAKDAY	NUT_PEAKVALUE	NUT_DEPLDAY_25	NUT_DEPLDAY_50	NUT_MINDAY	NUT_MINVALUE	NUT_SLOPE
2000	const5	137.39	6.25	7.37	21	80	91	101	95	1.66		108	148	0.52	-0.01
2000	median5			7.37			91	107	95	1.66		108	148	0.52	-0.01
2000	weibull	130.68	6.22	7.37	20	83	91	103	95	1.66		108	148	0.52	-0.01
2001	const5	178.64	6.87	8.59	25	73	85	98	41	2.96	94	84	126	0.38	-0.08
2001	median5			8.59			85	104	41	2.96	94	84	126	0.38	-0.08
2001	weibull	178.1	6.85	8.59	25	74	85	99	41	2.96	94	84	126	0.38	-0.08
2002	const5	191.24	6.17	7.11	30	82	95	112	43	3.29	116	91	150	0.74	-0.05
2002	median5	289.52	4.91	7.11	58	73	95	131	43	3.29	116	91	150	0.74	-0.05
2002	weibull	248.61	5.4	7.11	45	73	95	118	43	3.29	116	91	150	0.74	-0.05
2003	const5			9.68			55	89	41	2.6	81	73	150	0.22	-0.06
2003	median5			9.68			55	100	41	2.6	81	73	150	0.22	-0.06
2003	weibull			9.68			55		41	2.6	81	73	150	0.22	-0.06
2004	const5	3.69	3.69	3.69	0	87	87	87	46	2.43	104	89	125	0.34	-0.04
2004	median5	83.64	3.22	3.69	25	76	87	101	46	2.43	104	89	125	0.34	-0.04
2004	weibull	102.89	2.94	3.69	34	68	87	102	46	2.43	104	89	125	0.34	-0.04
2005	const5	84.37	5.27	5.46	15	88	96	103	64	3.4	96	86	104	0.58	-0.11
2005	median5	200.97	4.1	5.46	48	73	96	121	64	3.4	96	86	104	0.58	-0.11
2005	weibull	163.96	4.55	5.46	35	79	96	114	64	3.4	96	86	104	0.58	-0.11
2006	const5	3.96	3.96	3.96	0	99	99	99	47	3.13	112	92	141	0.32	-0.05
2006	median5	154.09	3.35	3.96	45	71	99	116	47	3.13	112	92	141	0.32	-0.05
2006	weibull	156.43	3.33	3.96	46	68	99	114	47	3.13	112	92	141	0.32	-0.05
2007	const5	3.99	3.99	3.99	0	97	97	97	60	3.42	110	96	140	0.53	-0.07
2007	median5	101.38	3.5	3.99	28	81	97	109	60	3.42	110	96	140	0.53	-0.07
2007	weibull	105.8	3.41	3.99	30	78	97	108	60	3.42	110	96	140	0.53	-0.07
2008	const5	134.59	5.38	6.02	24	90	100	114	41	2.86	101	91	145	0.42	-0.07
2008	median5			6.02		61	100		41	2.86	101	91	145	0.42	-0.07
2008	weibull	349.23	4.6	6.02	75	68	100	143	41	2.86	101	91	145	0.42	-0.07
2009	const5	40.9	5.11	5.29	7	112	117	119	43	2.66	97	85	146	0.09	-0.06
2009	median5			5.29		70	117		43	2.66	97	85	146	0.09	-0.06
2009	weibull	279.42	3.63	5.29	76	71	117	147	43	2.66	97	85	146	0.09	-0.06
2010	const5	73.29	5.24	5.43	13	83	87	96	41	3.06	94	83	112	0.07	-0.07
2010	median5			5.43			87	111	41	3.06	94	83	112	0.07	-0.07
2010	weibull	152.52	4.62	5.43	32	74	87	106	41	3.06	94	83	112	0.07	-0.07
2011	const5	166.94	5.96	6.63	27	79	94	106	41	2.86	114	91	134	0.35	-0.04
2011	median5	283.65	4.65	6.63	60	61	94	121	41	2.86	114	91	134	0.35	-0.04
2011	weibull	246.09	5.13	6.63	47	67	94	114	41	2.86	114	91	134	0.35	-0.04
2012	const5	4.9	4.9	4.9	0	100	100	100	59	3.57	101	89	116	0.42	-0.08
2012	median5	137.04	3.92	4.9	34	80	100	114	59	3.57	101	89	116	0.42	-0.08
2012	weibull	145.08	3.72	4.9	38	75	100	113	59	3.57	101	89	116	0.42	-0.08
2013	const5	213.33	6.1	6.95	34	94	111	128	70	2.98	106	98	147	0.01	-0.09
2013	median5	325.66	4.86	6.95	66	81	111	147	70	2.98	106	98	147	0.01	-0.09
2013	weibull	277.78	5.45	6.95	50	85	111	135	70	2.98	106	98	147	0.01	-0.09
2014	const5	140.93	5.64	6.32	24	56	71	80	66	1.79	130	100	150	0.21	-0.02
2014	median5			6.32			71	107	66	1.79	130	100	150	0.21	-0.02
2014	weibull	216.9	4.72	6.32	45	57	71	102	66	1.79	130	100	150	0.21	-0.02
