# Supplementary material for: Spring blooms in the Baltic Sea have weakened but lengthened from 2000 to 2014
Source: Copernicus journal article supplement (doi:10.5194/bg-13-4959-2016), 2016-09-08
Supplement: Supplementary file [file bg-13-4959-2016-supplement-title-page.pdf › bg-13-4959-2016-supplement-title-page.pdf]

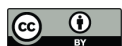

## *Supplement of*

# **Spring blooms in the Baltic Sea have weakened but lengthened from 2000 to 2014**

**Philipp M. M. Groetsch et al.**

*Correspondence to:* Philipp M. M. Groetsch (groetsch@waterinsight.nl)

- [bg-13-4959-2016-supplement-title-page.pdf](#)
- [appendix\\_metric\\_results\\_v2.xls](#)

The copyright of individual parts of the supplement might differ from the CC-BY 3.0 licence.
